# Supplementary material for: Siberian Arctic black carbon: gas flaring and wildfire impact
Source: Copernicus journal article supplement (doi:10.5194/acp-22-5983-2022), 2022-05-06
Supplement: Supplementary file 1 [file acp-22-5983-2022-supplement.pdf]

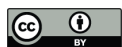

*Supplement of*

## **Siberian Arctic black carbon: gas flaring and wildfire impact**

**Olga B. Popovicheva et al.**

*Correspondence to:* Nikolaos Evangeliou ([nikolaos.evangeliou@nilu.no](mailto:nikolaos.evangeliou@nilu.no))

The copyright of individual parts of the supplement might differ from the article licence.

## Supplementary Tables

**Table S 1.** Monthly median EBC (880) with 25<sup>th</sup> and 75<sup>th</sup> percentiles and BC simulated by FLEXPART with ECLIPSEv6 and BCRUS emissions (ng m<sup>-3</sup>).

| Month   | EBC (880)<br>Measured | 25 <sup>th</sup><br>percentile | 75 <sup>th</sup><br>percentile | BC ECLIPSEv6-<br>CAMS | BC BCRUS-<br>CAMS |
|---------|-----------------------|--------------------------------|--------------------------------|-----------------------|-------------------|
| 08.2019 | 11.8                  | 4.9                            | 35.4                           | 38.6                  | 36.8              |
| 09.2019 | 15.9                  | 8.2                            | 31                             | 23.3                  | 23.0              |
| 10.2019 | 32.7                  | 20.8                           | 55.1                           | 44.9                  | 51.4              |
| 11.2019 | 39.5                  | 11.7                           | 67.7                           | 19.3                  | 20.5              |
| 12.2019 | 117.6                 | 68.0                           | 242.3                          | 123.5                 | 127.6             |
| 01.2020 | 61.7                  | 35.7                           | 93.6                           | 63                    | 75.1              |
| 02.2020 | 81.7                  | 58.2                           | 113.5                          | 119.5                 | 124.1             |
| 03.2020 | 39.8                  | 24.9                           | 55.8                           | 26.6                  | 29.8              |
| 04.2020 | 41.8                  | 35.2                           | 51.3                           | 12.3                  | 7.3               |
| 05.2020 | 27.0                  | 15.8                           | 45.2                           | 11.5                  | 11.5              |
| 06.2020 | 11.1                  | 9.4                            | 18.2                           | 6.1                   | 5.2               |
| 07.2020 | 21.0                  | 11.1                           | 41.9                           | 32.4                  | 33.8              |
| 08.2020 | 14.4                  | 8.6                            | 47.3                           | 23.4                  | 23.8              |
| 09.2020 | 30.7                  | 16.9                           | 70.5                           | 24.4                  | 24.4              |
| 10.2020 | 14.3                  | 6.7                            | 27.4                           | 14.8                  | 14.6              |
| 11.2020 | 57                    | 32.8                           | 96.9                           | 70.3                  | 72.7              |

**Table S 2.** Monthly mean BC contributions from domestic (DOM), energy (ENE), gas flaring (FLR), industry (IND), shipping (SHP), waste burning (WST), traffic (TRA), and biomass burning (BB) sectors (%) simulated by FLEXPART with ECLIPSEv6-CAMS emissions.

| Date    | DOM  | ENE | FLR  | IND | SHP | WST | TRA  | BB   |
|---------|------|-----|------|-----|-----|-----|------|------|
| 08.2019 | 2.8  | 0.7 | 29.6 | 3.3 | 1.0 | 0.3 | 5.9  | 56.1 |
| 09.2019 | 4.9  | 1.1 | 37.4 | 2.9 | 1.0 | 0.5 | 8.1  | 43.5 |
| 10.2019 | 4.6  | 0.6 | 37.6 | 3.5 | 0.1 | 0.5 | 4.9  | 47.8 |
| 11.2019 | 11.5 | 1.6 | 65.9 | 4.6 | 0.4 | 0.7 | 7.7  | 7.3  |
| 12.2019 | 15.6 | 2.0 | 65.8 | 6.8 | 0.2 | 0.9 | 8.2  | 0.2  |
| 01.2020 | 15.2 | 1.3 | 68.0 | 6.2 | 0.2 | 0.8 | 7.7  | 0.4  |
| 02.2020 | 25.2 | 1.0 | 50.6 | 9.5 | 0.2 | 1.4 | 11.5 | 0.2  |
| 03.2020 | 18.1 | 2.4 | 60.5 | 5.1 | 0.5 | 0.8 | 9.1  | 3.3  |
| 04.2020 | 3.0  | 1.7 | 46.8 | 2.2 | 0.3 | 0.2 | 3.5  | 42.0 |
| 05.2020 | 6.0  | 7.3 | 56.3 | 4.7 | 0.9 | 0.7 | 9.7  | 14.0 |
| 06.2020 | 2.7  | 1.1 | 35.8 | 2.0 | 0.8 | 0.3 | 4.6  | 52.4 |
| 07.2020 | 1.2  | 0.3 | 11.3 | 1.1 | 1.1 | 0.2 | 3.4  | 81.1 |
| 08.2020 | 1.4  | 0.5 | 22.2 | 1.4 | 0.7 | 0.2 | 3.2  | 70.0 |
| 09.2020 | 4.6  | 0.5 | 28.0 | 5.1 | 0.5 | 0.8 | 8.3  | 51.7 |
| 10.2020 | 11.4 | 0.8 | 47.5 | 6.5 | 0.5 | 1.2 | 11.9 | 19.8 |
| 11.2020 | 32.1 | 1.1 | 30.4 | 8.6 | 0.4 | 1.7 | 15.2 | 10.3 |

**Table S 3.** Monthly and annual (from September 2019 to August 2020) median BC concentrations simulated by FLEXPART with ECLIPSEv6 and BCRUS emissions from anthropogenic (ANT) sources as well as with CAMS emissions from BB sources ( $\text{ng m}^{-3}$ ). Annual averaged concentrations ( $\text{ng m}^{-3}$ ) and contributions (%).

| Date                 | ECLIPSEv6-CAMS |       | BCRUS-CAMS |       |
|----------------------|----------------|-------|------------|-------|
|                      | BB             | ANT   | BB         | ANT   |
| 09.2019              | 17.7           | 22.9  | 17.7       | 28.2  |
| 10.2019              | 60.5           | 65.8  | 60.5       | 89.2  |
| 11.2019              | 3.0            | 38.1  | 3.0        | 36.7  |
| 12.2019              | 0.4            | 195.6 | 0.4        | 272.5 |
| 01.2020              | 0.4            | 104.2 | 0.4        | 144.6 |
| 02.2020              | 0.3            | 136.3 | 0.3        | 178.0 |
| 03.2020              | 1.5            | 43.3  | 1.5        | 53.2  |
| 04.2020              | 21.1           | 29.1  | 21.0       | 37.0  |
| 05.2020              | 4.4            | 27.0  | 4.5        | 21.3  |
| 06.2020              | 20.8           | 18.9  | 20.7       | 27.0  |
| 07.2020              | 36.8           | 8.6   | 36.8       | 9.7   |
| 08.2020              | 48.6           | 20.8  | 46.4       | 23.8  |
| Annual concentration | 18.0           | 59.2  | 17.8       | 76.8  |
| Annual contribution  | 23.3           | 76.7  | 18.8       | 81.2  |

**Table S 4.** Monthly and annual median BC concentrations simulated by FLEXPART with ECLIPSEv6 and BCRUS emissions from gas flaring (FLR) sector ( $\text{ng m}^{-3}$ ). Annual averaged concentrations ( $\text{ng m}^{-3}$ ) and contributions (%).

| Date                  | ECLIPSEv6 | BCRUS  |
|-----------------------|-----------|--------|
| 09.2019               | 15.2      | 20.50  |
| 10.2019               | 47.5      | 70.87  |
| 11.2019               | 27.1      | 25.70  |
| 12.2019               | 129.1     | 206.00 |
| 01.1900               | 70.6      | 110.93 |
| 02.2020               | 69.1      | 110.47 |
| 03.2020               | 27.1      | 36.79  |
| 04.2020               | 23.5      | 31.43  |
| 05.2020               | 17.7      | 11.98  |
| 06.2020               | 14.2      | 22.35  |
| 07.2020               | 5.2       | 6.36   |
| 08.2020               | 15.4      | 18.47  |
| Annual concentrations | 38.5      | 56.0   |
| Annual contribution   | 49.9      | 59.2   |

**Table S 5.** 6h median AAE. Contributions of emission sectors during the pollution events in the cold and warm periods (%).

| season         | Episode | Date           | AAE  | DOM  | ENE  | FLR  | IND  | SHP | WST | TRA  | BB   |
|----------------|---------|----------------|------|------|------|------|------|-----|-----|------|------|
| COLD           | C1      | 05.11.19 12:00 | 0.9  | 8.7  | 0.7  | 70.6 | 9.1  | 0.0 | 0.8 | 6.3  | 3.7  |
|                |         | 12.11.19 12:00 | 1    | 11.9 | 1.3  | 54.0 | 7.2  | 0.7 | 1.1 | 11.1 | 12.7 |
|                |         | 16.11.19 18:00 | 0.7  | 0.4  | 0.0  | 98.6 | 0.2  | 0.0 | 0.0 | 0.5  | 0.2  |
|                | C2      | 04.12.19 12:00 | 1    | 7.2  | 3.7  | 78.5 | 3.8  | 0.1 | 0.7 | 5.7  | 0.4  |
|                |         | 19.12.19 12:00 | 1.05 | 10.8 | 1.6  | 72.6 | 8.1  | 0.0 | 0.8 | 6.0  | 0.1  |
|                | C3      | 04.01.20 06:00 | 0.9  | 6.6  | 1.9  | 82.5 | 3.0  | 0.1 | 0.5 | 5.3  | 0.1  |
|                | C4      | 11.02.20 03:00 | 0.8  | 3.4  | 0.3  | 91.0 | 1.3  | 0.1 | 0.2 | 3.7  | 0.0  |
|                |         | 16.02.20 12:00 | 1.1  | 14.7 | 0.7  | 63.5 | 6.8  | 0.1 | 1.6 | 12.5 | 0.0  |
|                | C5      | 26.02.20 21:00 | 1.05 | 35.8 | 0.9  | 18.1 | 22.9 | 0.2 | 2.5 | 17.0 | 2.6  |
|                |         | 01.03.20 04:00 | 0.85 | 5.4  | 2.6  | 88.4 | 1.2  | 0.1 | 0.2 | 2.0  | 0.1  |
|                |         | 07.03.20 15:00 | 0.85 | 5.5  | 0.4  | 89.7 | 1.9  | 0.1 | 0.3 | 2.1  | 0.1  |
|                |         | 12.03.20 21:00 | 0.75 | 8.6  | 0.4  | 85.3 | 1.7  | 0.1 | 0.3 | 3.4  | 0.2  |
|                | C6      | 06.11.20 06:00 | 0.8  | 7.6  | 0.3  | 21.6 | 4.2  | 0.1 | 0.6 | 7.4  | 58.2 |
|                | C7      | 16.11.20 12:00 | 1.1  | 72.8 | 0.4  | 0.3  | 3.2  | 0.5 | 1.3 | 19.9 | 1.4  |
|                |         | 19.11.20 12:00 | 1.2  | 37.1 | 0.6  | 14.6 | 24.5 | 0.2 | 3.4 | 19.0 | 0.5  |
|                | C8      | 24.11.20 12:00 | 1.3  | 33.7 | 1.0  | 16.6 | 18.2 | 0.4 | 3.5 | 22.7 | 4.0  |
| WARM           | W1      | 04.09.19 18:00 | 1.05 | 20.4 | 0.5  | 5.9  | 7.4  | 4.1 | 2   | 36.3 | 23.4 |
|                |         | 07.09.19 06:00 | 1.06 | 11.6 | 0.9  | 18   | 26.4 | 0.9 | 5   | 33.6 | 3.5  |
|                | W2      | 09.10.20 18:00 | 0.8  | 0.7  | 2.5  | 30.5 | 0.8  | 0.1 | 0.1 | 1.2  | 64.1 |
|                | W3      | 18.04.20 18:00 | 1.2  | 2.7  | 0.5  | 65.6 | 1.7  | 0.0 | 0.2 | 1.7  | 27.5 |
|                |         | 23.04.20 18:00 | 1.35 | 3.7  | 0.7  | 64.0 | 2.9  | 0.4 | 0.3 | 8.8  | 19.1 |
|                | W4      | 07.07.20 12:00 | 1.3  | 1.9  | 0.1  | 1.4  | 1.2  | 1.3 | 0.4 | 4.0  | 89.6 |
|                | W5      | 03.08.20 12:00 | 1.05 | 3.3  | 1.5  | 64.3 | 5.6  | 0.6 | 0.7 | 8.8  | 15.2 |
|                | W6      | 19.08.20 06:00 | 1    | 1.0  | 0.1  | 26.0 | 1.2  | 2.9 | 0.1 | 5.7  | 63.1 |
|                |         | 27.08.20 15:00 | 0.95 | 16.4 | 0.3  | 34.9 | 4.8  | 3.0 | 0.8 | 23.8 | 16.0 |
|                |         | 28.08.20 18:00 | 0.95 | 9.0  | 0.4  | 45.1 | 7.7  | 2.0 | 1.1 | 21.7 | 13.0 |
|                |         | 01.09.20 18:00 | 1.25 | 0.2  | 0.5  | 3.5  | 0.2  | 0.1 | 0.0 | 0.7  | 94.8 |
|                |         | 02.09.20 06:00 | 1.35 | 0.0  | 0.0  | 0.2  | 0.0  | 0.0 | 0.0 | 0.2  | 99.5 |
|                | W7      | 31.10.20 15:00 | 1.05 | 11.3 | 0.6  | 73.9 | 4.2  | 0.3 | 0.9 | 8.2  | 0.5  |
|                |         | 30.10.20 00:00 | 0.6  | 6.0  | 0.4  | 83.1 | 3.7  | 0.1 | 0.5 | 5.4  | 0.8  |
| 31.10.20 18:00 |         | 0.85           | 26   | 5    | 19.1 | 16.5 | 0.9  | 3.7 | 26  | 2.8  |      |

# Supplementary Figures

|                      | Date              | Pollution episode | Footprint emission sensitivity for BC | Anthropogenic contribution of BC |
|----------------------|-------------------|-------------------|---------------------------------------|----------------------------------|
| <b>COLD</b>          |                   |                   |                                       |                                  |
| C1 (05-16.11.19)     | 12.11.19<br>12:00 |                   |                                       |                                  |
|                      | 09.12.19<br>12:00 |                   |                                       |                                  |
| 29.12.19<br>12:00    |                   |                   |                                       |                                  |
| C3 (03 - 10.01.20)   | 04.01.20<br>06:00 |                   |                                       |                                  |
|                      |                   |                   |                                       |                                  |
| C4 (10.02- 18.02.20) | 11.02.20<br>3:00  |                   |                                       |                                  |

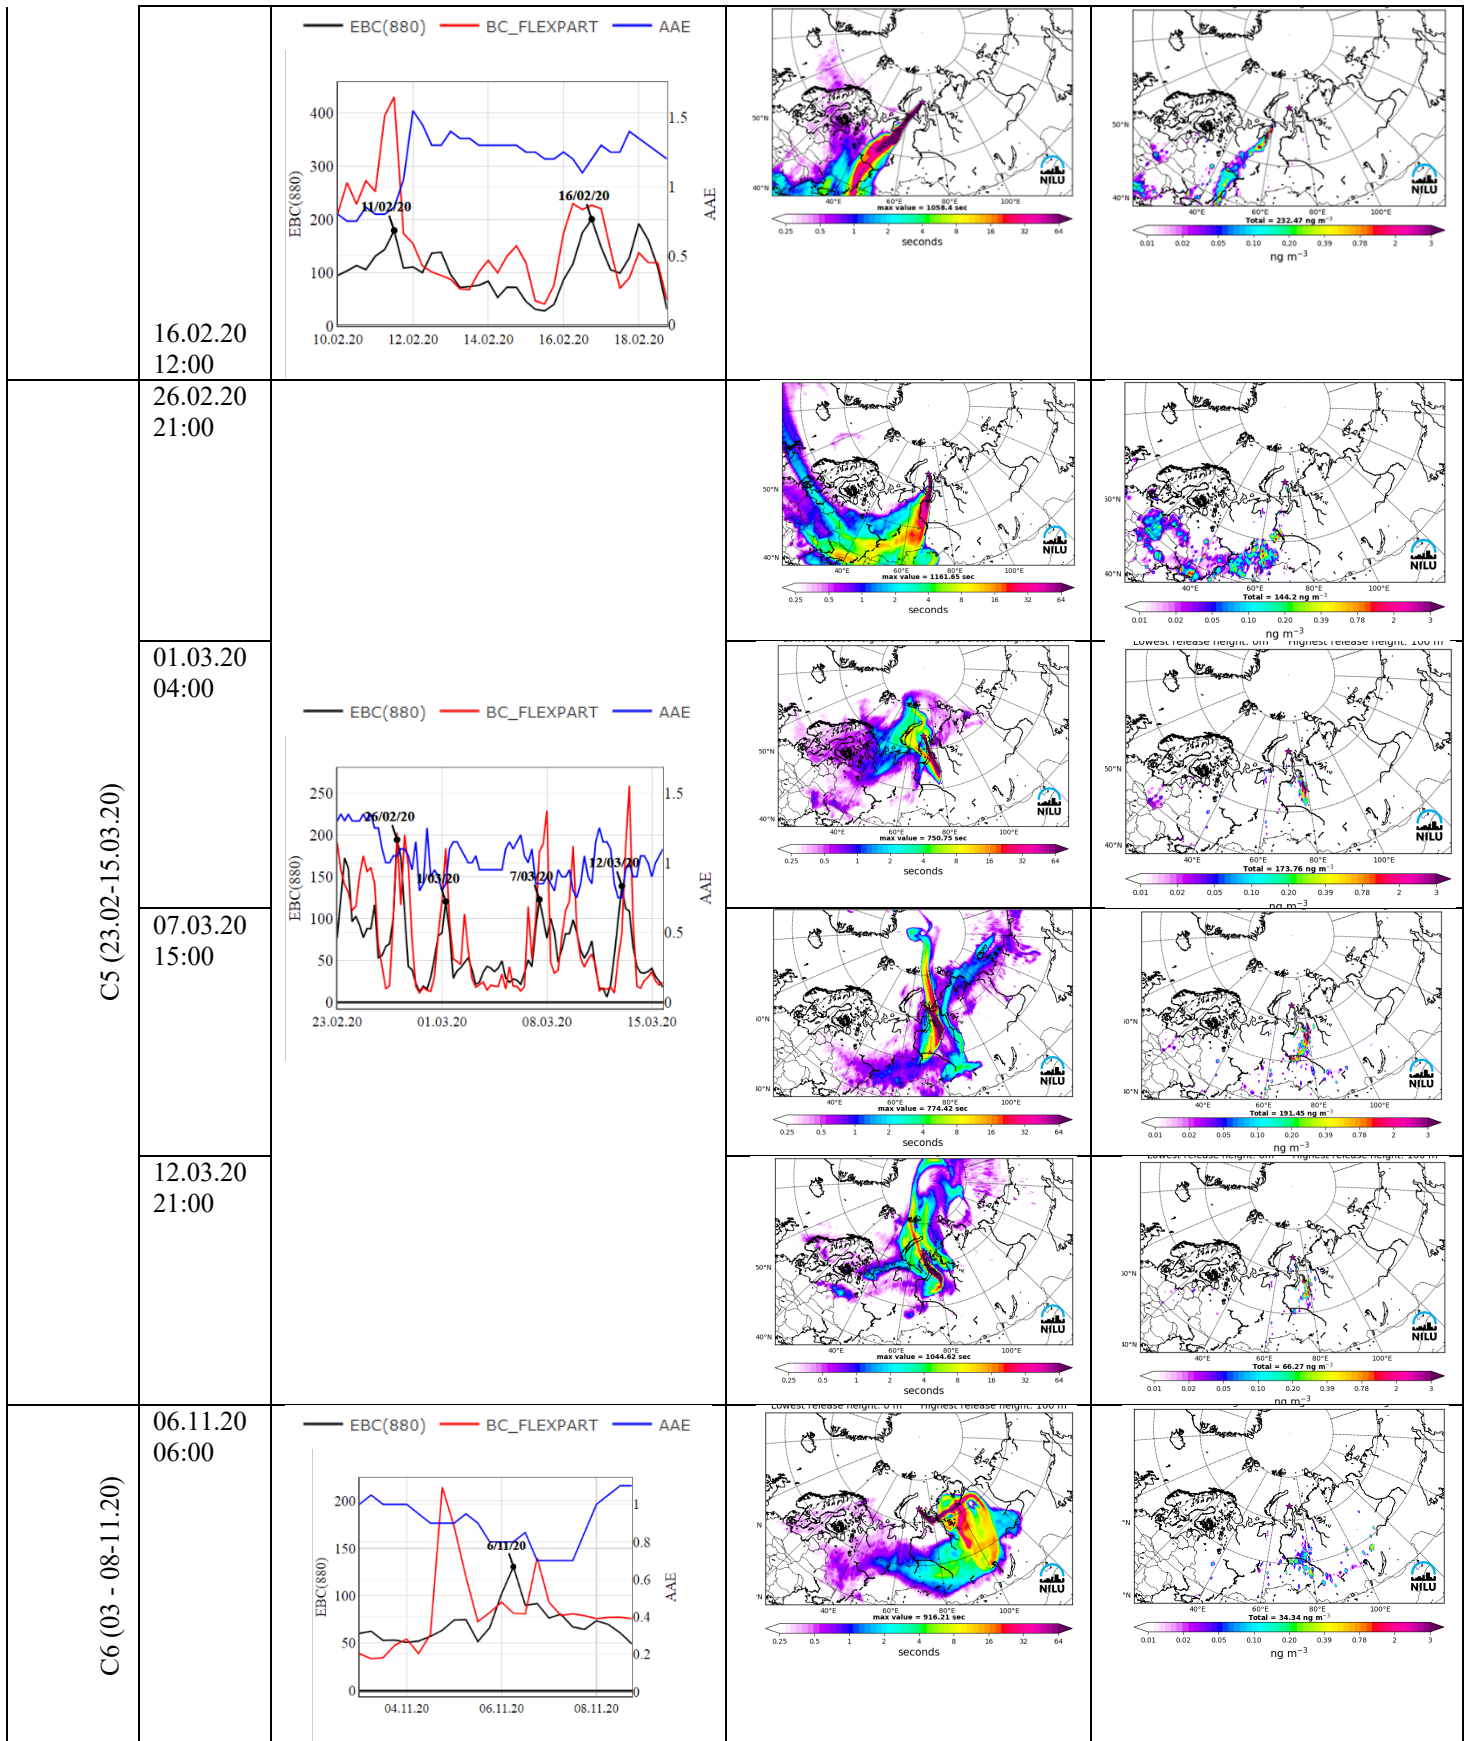

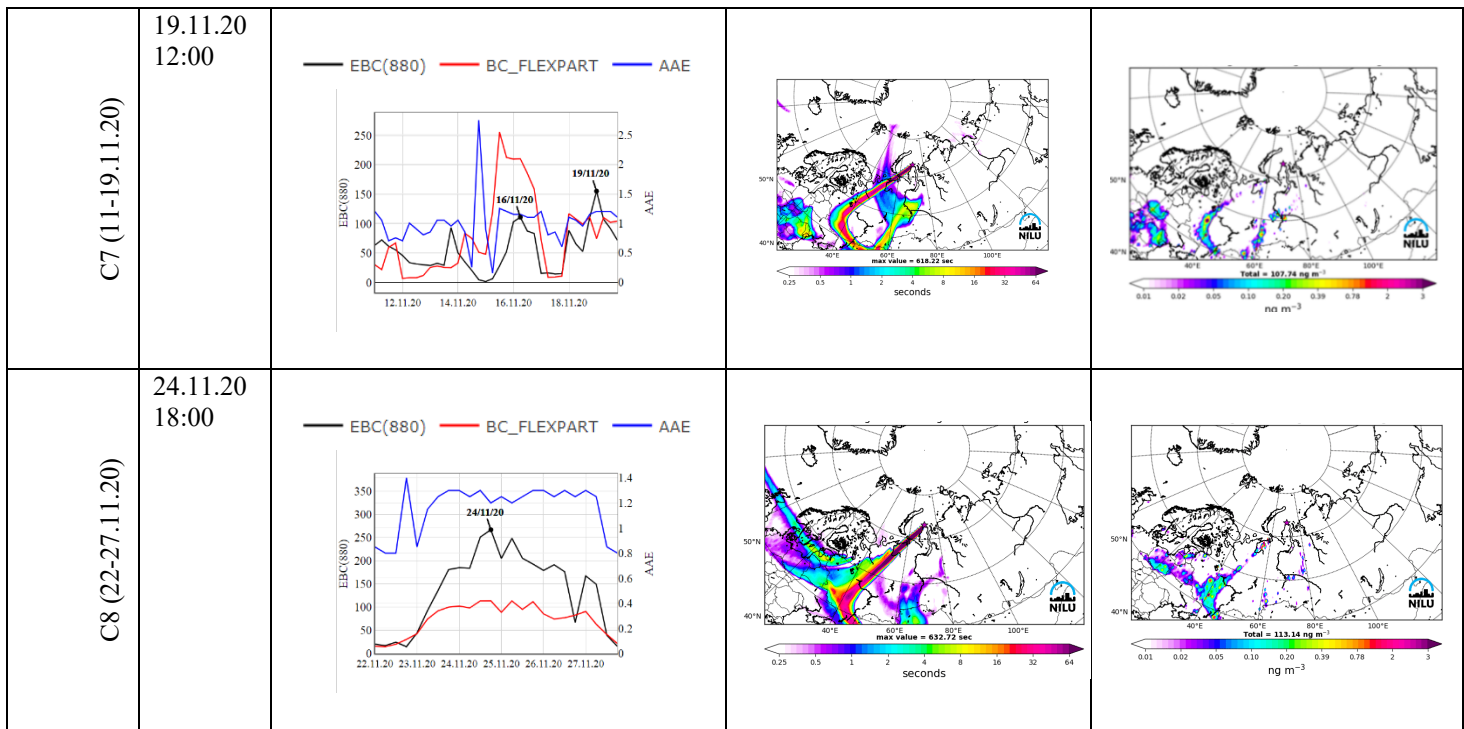

**Figure S 1.** Case study during pollution episodes in the cold period, others from shown in figures of the paper. Duration of pollution episodes and events are indicated. Time series for **6h median** EBC (880) (black), BC simulated by FLEXPART (red), AAE (blue) of pollution. Footprint emissions sensitivity and anthropogenic contribution of BC.



| WARM             | Date               |  | Footprint emission sensitivity for BC | Biomass burning contribution of BC |
|------------------|--------------------|--|---------------------------------------|------------------------------------|
| W1 (03-07.09.19) | 04. 09.19<br>16:00 |  |                                       |                                    |
|                  | 07. 09.19<br>06:00 |  |                                       |                                    |
| W2 (01-11.10.19) | 09.10.19<br>18:00  |  |                                       |                                    |
| W3 (18-23.04.20) | 18.04.20<br>18:00  |  |                                       |                                    |
|                  | 20.04.20<br>03:00  |  |                                       |                                    |

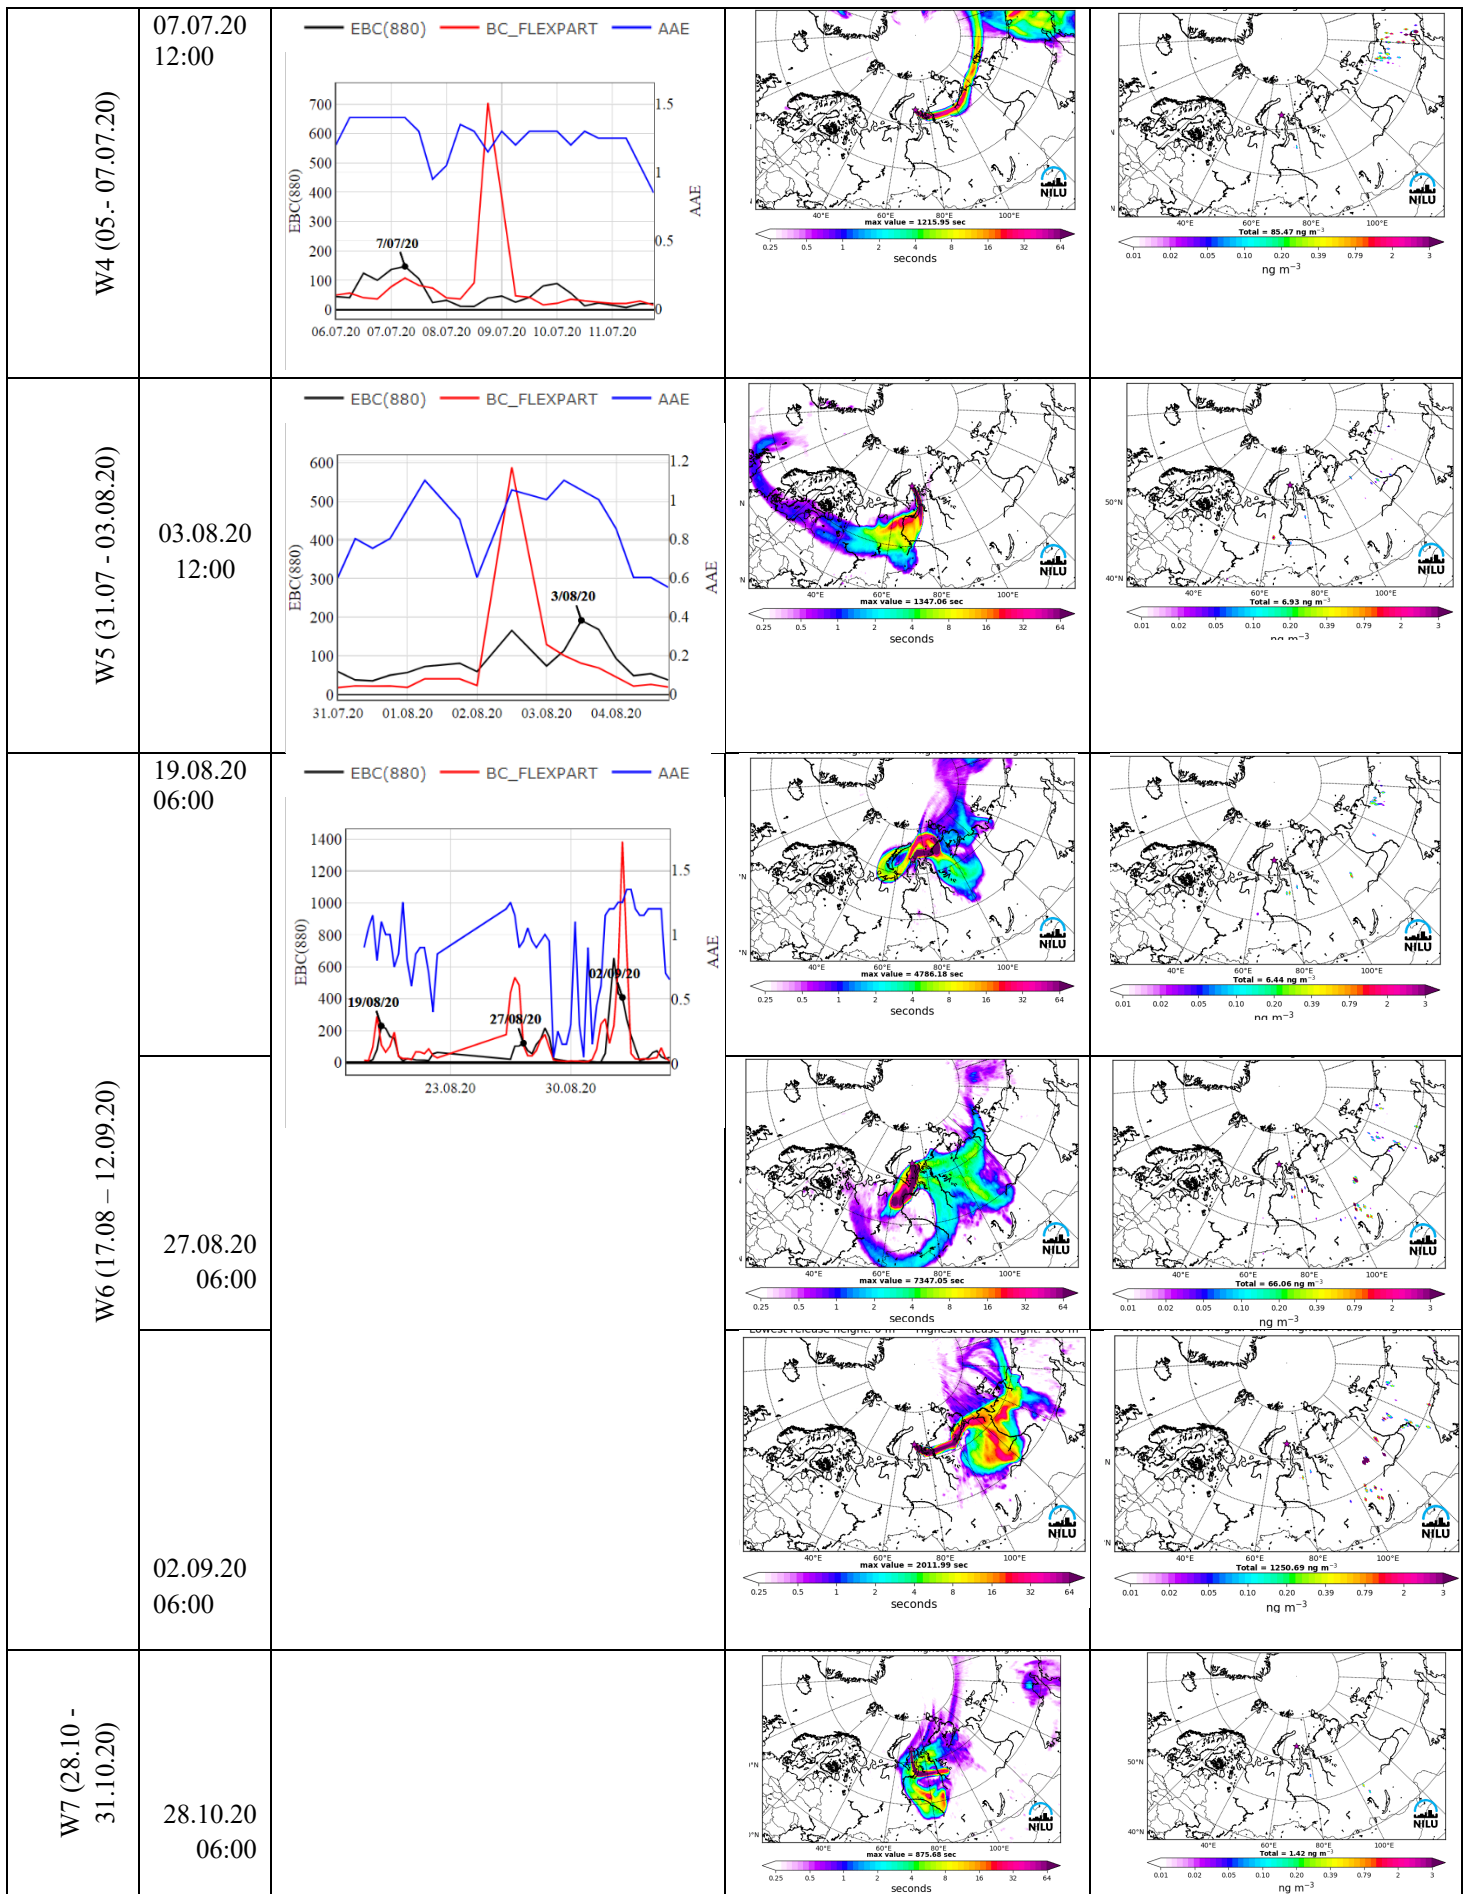

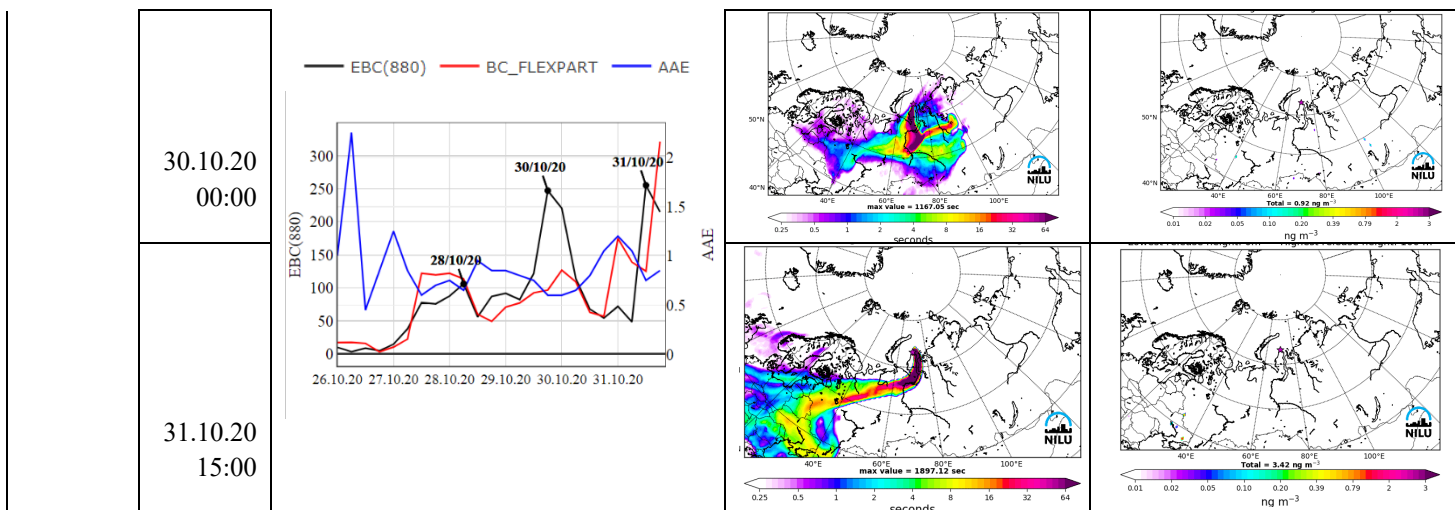

**Figure S 2.** Case study during pollution episodes in the warm period, others from shown in figures of the main paper. Similar to Fig. S1, biomass burning contribution of BC instead anthropogenic one.

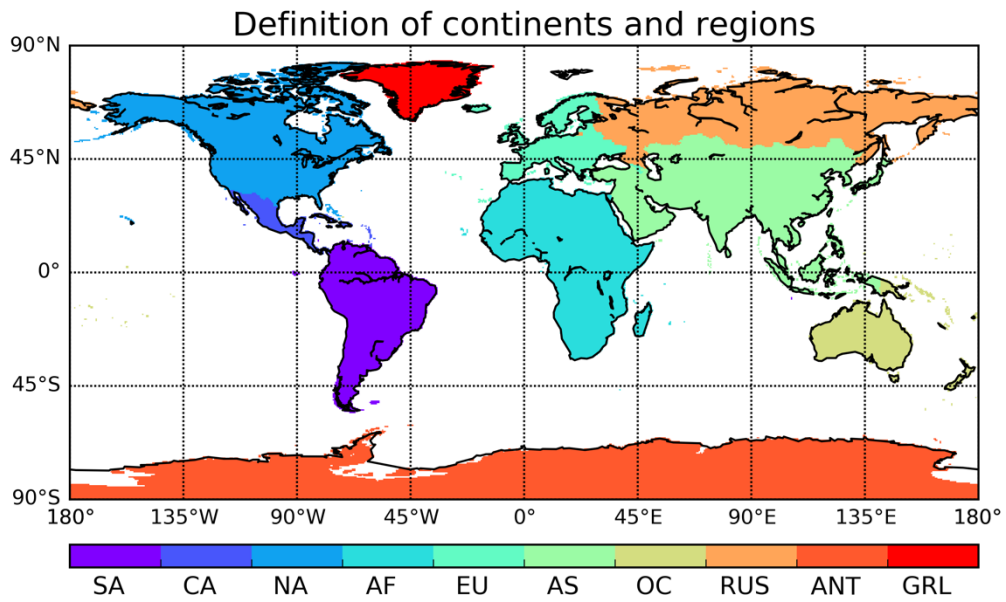

**Figure S 3.** Masked continents used in the present study for South America (SA), Central America (CA), North America (NA), Africa (AF), Europe (EU), Asia (AS), Oceania (OC), Russia (RUS), Antarctica (ANT) and Greenland (GRL).
